# Supplementary material
Source: publisher site journal article supplement (https://www.dovepress.com/article/167569)
Supplement: Supplementary file 1 [file get_supplementary_file.php]

**Supplemental Table 1. Studies excluded from the meta-analysis**

| Author                | Year | Reference                                                                                                                                                                                             | Reason for exclusion                                                                     |
|-----------------------|------|-------------------------------------------------------------------------------------------------------------------------------------------------------------------------------------------------------|------------------------------------------------------------------------------------------|
| Focke et al.          | 2018 | <a href="#">Appl Immunohistochem Mol Morphol. 2018 Jan;26(1):20-26.</a>                                                                                                                               | Lack of survival analysis data (hazard risk estimate or survival curve of OS, RFS, DFS). |
| del Sordo, R.         | 2018 | <a href="#">Histol Histopathol. 2018 Jan;33(1):81-88.</a>                                                                                                                                             | Lack of survival analysis data (hazard risk estimate or survival curve of OS, RFS, DFS). |
| Webster et al.        | 2017 | <a href="#">Cell Cycle. 2017;16(22):2176-2182.</a>                                                                                                                                                    | Not a study of the prognosis of PHH3.                                                    |
| Tracht et al.         | 2017 | <a href="#">J Histochem Cytochem. 2017 Jul;65(7):399-405.</a>                                                                                                                                         | Lack of survival analysis data (hazard risk estimate or survival curve of OS, RFS, DFS). |
| Suzuki et al.         | 2017 | <a href="#">Brain Tumor Pathol. 2017 Oct;34(4):141-148.</a>                                                                                                                                           | Not a study of the prognosis of PHH3.                                                    |
| Stalhammar et al.     | 2017 | <a href="#">Histopathology. 2018 May;72(6):974-989.</a>                                                                                                                                               | Not a study of the prognosis of PHH3.                                                    |
| Staettner et al.      | 2017 | <a href="#">Hum Pathol. 2017 Jul;65:41-52.</a>                                                                                                                                                        | Not a study of the prognosis of PHH3.                                                    |
| Sillem et al.         | 2017 | <a href="#">Breast Care (Basel). 2017 Sep;12(4):244-250.</a>                                                                                                                                          | Lack of survival analysis data (hazard risk estimate or survival curve of OS, RFS, DFS). |
| Rompoti et al.        | 2017 | JOURNAL OF THE EUROPEAN ACADEMY OF DERMATOLOGY AND VENEREOLOGY                                                                                                                                        | Meeting Abstract.                                                                        |
| Raninga et al.        | 2017 | ANNALS OF ONCOLOGY                                                                                                                                                                                    | Meeting Abstract.                                                                        |
| Parameswaran et al.   | 2017 | JOURNAL OF CLINICAL ONCOLOGY                                                                                                                                                                          | Meeting Abstract.                                                                        |
| Nombela Blanco et al. | 2017 | ANNALS OF ONCOLOGY                                                                                                                                                                                    | Meeting Abstract.                                                                        |
| Maitland et al.       | 2017 | <a href="http://www.embase.com/search/results?subaction=viewrecord&amp;from=export&amp;id=L617435940">http://www.embase.com/search/results?subaction=viewrecord&amp;from=export&amp;id=L617435940</a> | Irrelevant research.                                                                     |
| Li et al.             | 2017 | <a href="#">Chinese Journal of Diagnostic Pathology</a>                                                                                                                                               | Lack of survival analysis data (hazard risk estimate or survival curve of OS, RFS, DFS). |
| Li et al.             | 2017 | Journal of Mudanjiang Medical Universi                                                                                                                                                                | Lack of survival analysis data (hazard risk estimate or survival curve of OS, RFS, DFS). |
| Lee et al.            | 2017 | <a href="#">Appl Immunohistochem Mol Morphol. 2017 Jan;25(1):25-31.</a>                                                                                                                               | Lack of survival analysis data (hazard risk estimate or survival curve of OS, RFS, DFS). |
| Koch et al.           | 2017 | <a href="#">Histochem Cell Biol. 2017 Aug;148(2):207-216.</a>                                                                                                                                         | Irrelevant research.                                                                     |
| Klieser et al.        | 2017 | <a href="#">Hum Pathol. 2017 Jul;65:41-52.</a>                                                                                                                                                        | Not a study of the prognosis of PHH3.                                                    |
| Kim et al.            | 2017 | <a href="#">Oncotarget. 2017 May 10;8(39):65064-65076.</a>                                                                                                                                            | /                                                                                        |
| Ionkina et al.        | 2017 | Front Oncol. 2017 May 15;7:94.                                                                                                                                                                        | Meeting Abstract                                                                         |

|                  |                                                                                                        |                                                                                                                                                                         |
|------------------|--------------------------------------------------------------------------------------------------------|-------------------------------------------------------------------------------------------------------------------------------------------------------------------------|
| Inoue et al.     | 2017 JOURNAL OF THORACIC ONCOLOGY S836-S837 P2.01-080                                                  | Meeting Abstract.                                                                                                                                                       |
| Infante et al.   | 2017 <u>Cancer Chemother Pharmacol. 2017 Feb;79(2):315-326.</u>                                        | Irrelevant research.                                                                                                                                                    |
| Husari et al.    | 2017 <u>Oxid Med Cell Longev. 2017;2017:6063201.</u>                                                   | Irrelevant research.                                                                                                                                                    |
| Han et al.       | 2017 <a href="http://www.smmu.edu.cn/">http://www.smmu.edu.cn/</a>                                     | Lack of survival analysis data (hazard risk estimate or survival curve of OS, RFS, DFS).                                                                                |
| Gao et al.       | 2017 <u>Chinese Journal of Clinical and Experimental Pathology</u>                                     | Not a study of the prognosis of PHH3.                                                                                                                                   |
| Fernandez et al. | 2017 AMERICAN JOURNAL OF RESPIRATORY AND CRITICAL CARE MEDICINE                                        | Meeting Abstract.                                                                                                                                                       |
| Fan et al.       | 2017 Journal of Taishan Medical College                                                                | Lack of survival analysis data (hazard risk estimate or survival curve of OS, RFS, DFS).                                                                                |
| Ertan et al.     | 2017 <u>J Environ Pathol Toxicol Oncol. 2017;36(3):237-244.</u>                                        | Lack of survival analysis data (hazard risk estimate or survival curve of OS, RFS, DFS).                                                                                |
| Elmaci et al.    | 2017 <u>Clin Neuropathol. 2017 Nov/Dec;36(6):272-282.</u>                                              | Not a study of the prognosis of PHH3.                                                                                                                                   |
| Ding et al.      | 2017 MODERN PATHOLOGY                                                                                  | Meeting Abstract.                                                                                                                                                       |
| Deng et al.      | 2017 <u>Journal of Chengdu Medical College</u>                                                         | Lack of survival analysis data (hazard risk estimate or survival curve of OS, RFS, DFS).                                                                                |
| Chow et al.      | 2017 <u>Histopathology. 2017 Apr;70(5):746-755.</u>                                                    | /                                                                                                                                                                       |
| Chavali et al.   | 2017 <u>Neurol India. 2017 Nov-Dec;65(6):1345-1349.</u>                                                | Not a study of the prognosis of PHH3.                                                                                                                                   |
| Bosch et al.     | 2017 <u>Appl Immunohistochem Mol Morphol. 2017 Sep;25(8):543-547.</u>                                  | Not a study of the prognosis of PHH3.                                                                                                                                   |
| Blanco et al.    | 2017 ANNALS OF ONCOLOGY                                                                                | Meeting Abstract.                                                                                                                                                       |
| Agarwal et al.   | 2017 <u>Am J Dermatopathol. 2017 Jul;39(7):504-507.</u>                                                | Not a study of the prognosis of PHH3.                                                                                                                                   |
| Zhu et al.       | 2016 <u>Oncotarget. 2016 Jul 19;7(29):45005-45014.</u>                                                 | /                                                                                                                                                                       |
| Wong et al.      | 2016 AMERICAN JOURNAL OF GASTROENTEROLOGY                                                              | Meeting Abstract.                                                                                                                                                       |
| Winther et al.   | 2016 <u>Am J Clin Pathol. 2016 Oct;146(4):510-20.</u>                                                  | /                                                                                                                                                                       |
| Wandler et al.   | 2016 <u>J Cutan Pathol. 2016 Nov;43(11):956-962.</u>                                                   | Not a study of the prognosis of PHH3.                                                                                                                                   |
| Villani et al.   | 2016 <u>Ann Surg Oncol. 2016 Dec;23(Suppl 5):609-617. Epub 2016 Mar 28.</u>                            | Lack of survival analysis data (The patients were divided into three risk classes (G1, G2, and G3) according to the tumor grade, not the level of the PHH3 expression). |
| Varughese et al. | 2016 <u>J Clin Pathol. 2016 Jan;69(1):26-34. doi: 10.1136/iclinpath-2015-202983. Epub 2015 Jul 17.</u> | Statistical defect.                                                                                                                                                     |
| Tokes et al.     | 2016 <u>Virchows Arch. 2016 Jun;468(6):675-86.</u>                                                     | Lack of survival analysis data (hazard risk estimate or survival curve of OS, RFS, DFS).                                                                                |
| Saini et al.     | 2016 <u>PLoS One. 2016 Feb 10;11(2):e0148656.</u>                                                      | Not a study of the prognosis of PHH3.                                                                                                                                   |
| Parsels et al.   | 2016 <u>Cell Cycle. 2016;15(5):730-9.</u>                                                              | Irrelevant research.                                                                                                                                                    |

|                   |                                                                                   |                                                                                          |
|-------------------|-----------------------------------------------------------------------------------|------------------------------------------------------------------------------------------|
| Ozturk et al.     | 2016 Endocr Pathol. 2016 Jun;27(2):162-70.                                        | Lack of survival analysis data (hazard risk estimate or survival curve of OS, RFS, DFS). |
| O'Halloran et al. | 2016 PEDIATRIC BLOOD & CANCER                                                     | Meeting Abstract.                                                                        |
| Nielsen et al.    | 2016 <u>Diagn Pathol.</u> 2016 Apr 9;11:35.                                       | Lack of survival analysis data (hazard risk estimate or survival curve of OS, RFS, DFS). |
| Mross et al.      | 2016 <u>Cancer Chemother Pharmacol.</u> 2016 Aug;78(2):405-17.                    | Irrelevant research.                                                                     |
| Merkel et al.     | 2016 JOURNAL OF THE AMERICAN ACADEMY OF DERMATOLOGY                               | Meeting Abstract.                                                                        |
| Marwaha et al.    | 2016 J Cutan Pathol. 2016 Dec;43(12):1186-1196.                                   | Not a study of the prognosis of PHH3.                                                    |
| Lysak et al.      | 2016 PATHOLOGIA Volume 26,Period 2,Page 4-12.                                     | Non-English literature                                                                   |
| Li et al.         | 2016 ОРИГІНАЛЬНІ ДОСЛІДЖЕННЯ / ORIGINAL RESEARCHES                                | Non-English literature                                                                   |
| Lee et al.        | 2016 <u>Cancer Lett.</u> 2016 Jul 1;376(2):310-7.                                 | Irrelevant research.                                                                     |
| Lamba et al.      | 2016 <u>PLoS One.</u> 2016 Feb 10;11(2):e0148656.                                 | Not a study of the prognosis of PHH3.                                                    |
| Khan et al.       | 2016 <u>Clin Epigenetics.</u> 2016 Aug 31;8:88.                                   | /                                                                                        |
| Kruger et al.     | 2016 <u>Am J Physiol Gastrointest Liver Physiol.</u> 2017 Sep 1;313(3):G180-G191. | Irrelevant research.                                                                     |
| Islam et al.      | 2016 Target Oncol. 2016 Apr;11(2):209-27.                                         | Irrelevant research.                                                                     |
| Huang et al.      | 2016 <u>Hainan Medical Journal</u>                                                | Not a study of the prognosis of PHH3.                                                    |
| Hanley et al.     | 2016 CANCER RESEARCH                                                              | Meeting Abstract.                                                                        |
| Ginter et al.     | 2016 <u>Hum Pathol.</u> 2016 Mar;49:90-8.                                         | Not a study of the prognosis of PHH3.                                                    |
| Duregon et al.    | 2016 <u>Oncotarget.</u> 2016 Apr 19;7(16):21190-8                                 | Statistical defect.                                                                      |
| Cornelia          | 2016 <u>Appl Immunohistochem Mol Morphol.</u> 2018 Jan;26(1):20-26.               | Not a study of the prognosis of PHH3                                                     |
| Burke et al.      | 2016 CANCER RESEARCH                                                              | Meeting Abstract.                                                                        |
| Bedekovics et al. | 2016 VIRCHOWS ARCHIV                                                              | Meeting Abstract.                                                                        |
| Wang et al.       | 2015 CANCER RESEARCH                                                              | Meeting Abstract.                                                                        |
| Voss et al.       | 2015 Am J Surg Pathol. 2015 Jan;39(1):13-24.                                      | Lack of survival analysis data (confidence interval of hazard risk estimate).            |
| Uguen et al.      | 2015 <u>Virchows Arch.</u> 2015 Jul;467(1):47-54.                                 | Lack of survival analysis data (hazard risk estimate or survival curve of OS, RFS, DFS). |
| Tetzlaff et al.   | 2015 <u>Clin Cosmet Investig Dermatol.</u> 2015 Jan 30;8:35-46.                   | Review.                                                                                  |
| Ramani et al.     | 2015 <u>J Histochem Cytochem.</u> 2015 Jun;63(6):397-407.                         | /                                                                                        |
| Pang et al.       | 2015 <u>Int J Clin Exp Pathol.</u> 2015 May 1;8(5):4418-26. eCollection 2015.     | Not a study of the prognosis of PHH3.                                                    |
| Ottmann et al.    | 2015 <u>J Am Acad Dermatol.</u> 2015 Oct;73(4):637-44.                            | Not a study of the prognosis of PHH3.                                                    |
| Olar et al.       | 2015 <u>Brain Pathol.</u> 2015 May;25(3):266-75                                   | /                                                                                        |

|                      |                                                                                                                                                                                                          |                                                                                          |
|----------------------|----------------------------------------------------------------------------------------------------------------------------------------------------------------------------------------------------------|------------------------------------------------------------------------------------------|
| Olar et al.          | 2015 <a href="#">Acta Neuropathol. 2015 Apr;129(4):585-96.</a>                                                                                                                                           | Not a study of the prognosis of PHH3.                                                    |
| Moreno et al.        | 2015 <a href="#">Clin Cancer Res. 2015 Jan 15;21(2):267-73.</a>                                                                                                                                          | Irrelevant research.                                                                     |
| Massey et al.        | 2015 <a href="#">PLoS One. 2015 Jul 28;10(7):e0134306.</a>                                                                                                                                               | Irrelevant research.                                                                     |
| Martinez et al.      | 2015 <a href="#">PLoS One. 2015 Sep 23;10(9):e0138616.</a>                                                                                                                                               | Irrelevant research.                                                                     |
| Liu et al.           | 2015 <a href="#">Chinese Journal of Clinical and Experimental Pathology</a>                                                                                                                              | Lack of survival analysis data (hazard risk estimate or survival curve of OS, RFS, DFS). |
| Liang et al.         | 2015 <a href="#">nt J Clin Exp Pathol. 2015 Jun 1;8(6):7196-202. eCollection 2015.</a>                                                                                                                   | Not a study of the prognosis of PHH3.                                                    |
| Li et al.            | 2015 CANCER RESEARCH                                                                                                                                                                                     | Meeting Abstract                                                                         |
| Li et al.            | 2015 <a href="http://www.tijmu.edu.cn/">http://www.tijmu.edu.cn/</a>                                                                                                                                     | Not a study of the prognosis of PHH3.                                                    |
| Konakazawa et al.    | 2015 <a href="#">Brain Res. 2015 Jul 21;1614:28-37. doi: 10.1016/j.brainres.2015.04.013. Epub 2015 Apr 17.</a>                                                                                           | Irrelevant research.                                                                     |
| Iwasaki et al.       | 2015 <a href="#">Pathol Int. 2015 Aug;65(8):404-9. doi: 10.1111/pin.12305. Epub 2015 May 18.</a>                                                                                                         | /                                                                                        |
| Ionkina et al.       | 2015 <a href="http://dx.doi.org/10.1158/1535-7163.TARG-15-C34">http://dx.doi.org/10.1158/1535-7163.TARG-15-C34</a>                                                                                       | Irrelevant research.                                                                     |
| Henry et al.         | 2015 <a href="http://dx.doi.org/10.1158/1535-7163.TARG-15-B145">http://dx.doi.org/10.1158/1535-7163.TARG-15-B145</a>                                                                                     | Irrelevant research.                                                                     |
| Gressot et al.       | 2015 <a href="#">Int J Cancer. 2015 May 1;136(9):2047-54.</a>                                                                                                                                            | Irrelevant research.                                                                     |
| Goltz et al.         | 2015 <a href="#">Pathology. 2015 Dec;47(7):629-36. doi: 10.1097/PAT.0000000000000320.</a>                                                                                                                | /                                                                                        |
| Gebreyohannes et al. | 2015 CANCER RESEARCH                                                                                                                                                                                     | Meeting Abstract                                                                         |
| Gerring et al.       | 2015 <a href="#">Histopathology. 2015 Oct;67(4):538-47. doi: 10.1111/his.12678. Epub 2015 Mar 31.</a>                                                                                                    | /                                                                                        |
| Gagner et al.        | 2015 CANCER RESEARCH                                                                                                                                                                                     | Meeting Abstract                                                                         |
| Duregon et al.       | 2015 <a href="#">Neuro Oncol. 2015 May;17(5):663-9. doi: 10.1093/neuonc/nov002. Epub 2015 Feb 1.</a>                                                                                                     | Not a study of the prognosis of PHH3.                                                    |
| Dessauvagie et al.   | 2015 <a href="#">Pathology. 2015 Jun;47(4):329-34. doi: 10.1097/PAT.0000000000000248.</a>                                                                                                                | Not a study of the prognosis of PHH3.                                                    |
| Cui et al.           | 2015 <a href="#">Appl Immunohistochem Mol Morphol. 2015 Nov-Dec;23(10):689-95. doi: 10.1097/PAI.0000000000000137.</a>                                                                                    | Not a study of the prognosis of PHH3.                                                    |
| Cornillie et al.     | 2015 <a href="http://www.embase.com/search/results?subaction=viewrecord&amp;from=export&amp;id=L72011489">http://www.embase.com/search/results?subaction=viewrecord&amp;from=export&amp;id=L72011489</a> | Irrelevant research.                                                                     |
| Brustmann et al.     | 2015 <a href="#">Int J Gynecol Pathol. 2015 Mar;34(2):187-95. doi: 10.1097/PGP.0000000000000116.</a>                                                                                                     | Lack of survival analysis data (hazard risk estimate or survival curve of OS, RFS, DFS). |
| Ben et al.           | 2015 <a href="#">Clin Cancer Res. 2017 May 1;23(9):2289-2300. doi: 10.1158/1078-0432.CCR-16-1930. Epub 2016 Nov 17.</a>                                                                                  | Irrelevant research.                                                                     |
| Alkhasawneh et al.   | 2015 <a href="#">Am J Clin Pathol. 2015 Mar;143(3):385-92. doi: 10.1309/AJCPAPH28VHZEKNQ.</a>                                                                                                            | /                                                                                        |
| Zhou et al.          | 2014 <a href="#">Am J Dermatopathol. 2014 Jan;36(1):74-9. doi: 10.1097/DAD.0b013e3182914c64.</a>                                                                                                         | Not a study of the prognosis of PHH3.                                                    |
| Xu                   | 2014 <a href="http://www.sxmu.edu.cn/">http://www.sxmu.edu.cn/</a>                                                                                                                                       | /                                                                                        |
| Wang et al.          | 2014 <a href="#">Chinese Journal of Tissue Engineering Research</a>                                                                                                                                      | Not a study of the prognosis of PHH3.                                                    |
| Thareja et al.       | 2014 <a href="#">Am J Dermatopathol. 2014 Jan;36(1):64-7.</a>                                                                                                                                            | Not a study of the prognosis of PHH3.                                                    |
| Seremet et al.       | 2014 <a href="http://www.embase.com/search/results?subaction=viewrecord&amp;from=export&amp;id=L71772420">http://www.embase.com/search/results?subaction=viewrecord&amp;from=export&amp;id=L71772420</a> | Lack of survival analysis data (hazard risk estimate or survival                         |

---

|                           |                                                                                                                                                                                                                 |                                                                                          |
|---------------------------|-----------------------------------------------------------------------------------------------------------------------------------------------------------------------------------------------------------------|------------------------------------------------------------------------------------------|
| Rehman et al.             | 2014 HEPATOLOGY                                                                                                                                                                                                 | curve of OS, RFS, DFS).<br>Meeting Abstract                                              |
| Papanicolau-Sengos et al. | 2014 MODERN PATHOLOGY                                                                                                                                                                                           | Meeting Abstract                                                                         |
| Olar et al.               | 2014 MODERN PATHOLOGY                                                                                                                                                                                           | Meeting Abstract                                                                         |
| Nowak et al.              | 2014 <u>World J Urol. 2014 Jun;32(3):703-7.</u>                                                                                                                                                                 | Lack of survival analysis data (hazard risk estimate or survival curve of OS, RFS, DFS). |
| McCormick et al.          | 2014 <u><a href="http://www.embase.com/search/results?subaction=viewrecord&amp;from=export&amp;id=L71525112">http://www.embase.com/search/results?subaction=viewrecord&amp;from=export&amp;id=L71525112</a></u> | Lack of survival analysis data (hazard risk estimate or survival curve of OS, RFS, DFS). |
| Lu et al.                 | 2014 <u><a href="http://www.zju.edu.cn/">http://www.zju.edu.cn/</a></u>                                                                                                                                         | Lack of survival analysis data (hazard risk estimate or survival curve of OS, RFS, DFS). |
| Lee et al.                | 2014 <u>Sci Rep. 2014 May 30;4:5122.</u>                                                                                                                                                                        | Not a study of the prognosis of PHH3.                                                    |
| Lee et al.                | 2014 MODERN PATHOLOGY                                                                                                                                                                                           | Meeting Abstract                                                                         |
| Kilgore et al.            | 2014 MODERN PATHOLOGY                                                                                                                                                                                           | Meeting Abstract                                                                         |
| Kemmerling et al.         | 2014 <u>Oncol Lett. 2014 Mar;7(3):745-749. Epub 2014 Jan 15.</u>                                                                                                                                                | Not a study of the prognosis of PHH3.                                                    |
| Henderson et al.          | 2014 MODERN PATHOLOGY                                                                                                                                                                                           | Meeting Abstract                                                                         |
| <b>Henderson et al.</b>   | 2014 <u>J Cutan Pathol. 2014 Nov;41(11):846-52.</u>                                                                                                                                                             | Statistical defect.                                                                      |
| Grachtchouk et al.        | 2014 JOURNAL OF INVESTIGATIVE DERMATOLOGY                                                                                                                                                                       | Meeting Abstract                                                                         |
| Duregon et al.            | 2014 <u>Mod Pathol. 2014 Sep;27(9):1246-54.</u>                                                                                                                                                                 | /                                                                                        |
| Cullinane et al.          | 2014 <u>Nucl Med Biol. 2014 Feb;41(2):148-54.</u>                                                                                                                                                               | Irrelevant research.                                                                     |
| Braun et al.              | 2014 <u>Int J Cancer. 2014 Jul 1;135(1):19-26.</u>                                                                                                                                                              | Irrelevant research.                                                                     |
| Backer-Grondahl et al.    | 2014 <u>Int J Clin Exp Pathol. 2014 Sep 15;7(10):7206-19. eCollection 2014.</u>                                                                                                                                 | Lack of survival analysis data (hazard risk estimate or survival curve of OS, RFS, DFS). |
| Yin et al.                | 2013 Maternal and Child Health Care of China                                                                                                                                                                    | Lack of survival analysis data (hazard risk estimate or survival curve of OS, RFS, DFS). |
| Tetzlaff et al.           | 2013 <u>Mod Pathol. 2013 Sep;26(9):1153-60.</u>                                                                                                                                                                 | Lack of survival analysis data (hazard risk estimate or survival curve of OS, RFS, DFS). |
| Nonaka et al.             | 2013 LABORATORY INVESTIGATION                                                                                                                                                                                   | Meeting Abstract                                                                         |
| Nakashima et al.          | 2013 <u>Anticancer Res. 2013 Feb;33(2):461-7.</u>                                                                                                                                                               | No hazard risk (HR) estimate for esophageal squamous cell carcinoma.                     |
| Mills et al.              | 2013 <u>Am J Surg Pathol. 2013 May;37(5):634-42.</u>                                                                                                                                                            | Lack of survival analysis data (hazard risk estimate or survival curve of OS, RFS, DFS). |

---

|                          |                                                                                                                                                                                                          |                                                                                                                |
|--------------------------|----------------------------------------------------------------------------------------------------------------------------------------------------------------------------------------------------------|----------------------------------------------------------------------------------------------------------------|
| Li et al.                | 2013 <a href="#">Eur J Med Chem. 2013 Jul;65:151-7.</a>                                                                                                                                                  | Irrelevant research.                                                                                           |
| Kunos et al.             | 2013 <a href="#">Front Oncol. 2013 Sep 18;3:226.</a>                                                                                                                                                     | Irrelevant research.                                                                                           |
| Knutsvik et al.          | 2013 LABORATORY INVESTIGATION                                                                                                                                                                            | Meeting Abstract                                                                                               |
| Klintman et al.          | 2013 <a href="#">PLoS One. 2013 Dec 4;8(12):e81902.</a>                                                                                                                                                  | /                                                                                                              |
| Kikuchi et al.           | 2013 Cancer Research                                                                                                                                                                                     | Meeting Abstract                                                                                               |
| Karra et al.             | 2013 <a href="#">Bioorg Med Chem Lett. 2013 May 15;23(10):3081-7.</a>                                                                                                                                    | Irrelevant research.                                                                                           |
| Ishizawa et al.          | 2013 BLOOD                                                                                                                                                                                               | Meeting Abstract                                                                                               |
| Idriss et al.            | 2013 <a href="#">J Cutan Pathol. 2013 Jun;40(6):557-63.</a>                                                                                                                                              | Not a study of the prognosis of PHH3.                                                                          |
| Hale et al.              | 2013 <a href="#">Am J Surg Pathol. 2013 Jun;37(6):882-9.</a>                                                                                                                                             | The follow-up outcome is PFS. Our study did not include studies on PFS because of the small number of studies. |
| Gudlaugsson et al.       | 2013 <a href="#">Pol J Pathol. 2013 Apr;64(1):1-8.</a>                                                                                                                                                   | /                                                                                                              |
| Fung et al.              | 2013 <a href="#">Acta Cytol. 2013;57(5):501-8.</a>                                                                                                                                                       | Not a study of the prognosis of PHH3.                                                                          |
| Draganova-Tacheva et al. | 2013 <a href="#">Acta Cytol. 2013;57(3):291-5.</a>                                                                                                                                                       | Not a study of the prognosis of PHH3.                                                                          |
| Cui et al.               | 2013 <a href="#">Appl Immunohistochem Mol Morphol. 2015 Nov-Dec;23(10):689-95. doi: 10.1097/PAI.000000000000137.</a>                                                                                     | Lack of survival analysis data (hazard risk estimate or survival curve of OS, RFS, DFS).                       |
| Chen et al.              | 2013 <a href="#">Clinics (Sao Paulo). 2013 Jun;68(6):825-33.</a>                                                                                                                                         | Irrelevant research.                                                                                           |
| Chen et al.              | 2013 <a href="#">J Chemother. 2013 Aug;25(4):229-38.</a>                                                                                                                                                 | Irrelevant research.                                                                                           |
| Braun et al.             | 2013 <a href="#">World J Urol. 2013 Dec;31(6):1489-95.</a>                                                                                                                                               | Irrelevant research.                                                                                           |
| Armstrong et al.         | 2013 <a href="http://www.embase.com/search/results?subaction=viewrecord&amp;from=export&amp;id=L71299310">http://www.embase.com/search/results?subaction=viewrecord&amp;from=export&amp;id=L71299310</a> | Not a study of the prognosis of PHH3.                                                                          |
| Aftimos et al.           | 2013 <a href="#">Cancer Chemother Pharmacol. 2016 Jan;77(1):99-108.</a>                                                                                                                                  | Irrelevant research.                                                                                           |
| Washington et al.        | 2012 <a href="#">Sci Signal. 2012 Jul 24;5(234):ra52.</a>                                                                                                                                                | Irrelevant research.                                                                                           |
| Sun et al.               | 2012 <a href="#">BMJ Open. 2012 Oct 12;2(5). pii: e001071.</a>                                                                                                                                           | Lack of survival analysis data (hazard risk estimate or survival curve of OS, RFS, DFS).                       |
| Stomper et al.           | 2012 <a href="http://www.embase.com/search/results?subaction=viewrecord&amp;from=export&amp;id=L70662478">http://www.embase.com/search/results?subaction=viewrecord&amp;from=export&amp;id=L70662478</a> | Irrelevant research.                                                                                           |
| Solomides et al.         | 2012 <a href="#">Acta Cytol. 2012;56(3):285-8.</a>                                                                                                                                                       | Not a study of the prognosis of PHH3.                                                                          |
| Sini et al.              | 2012 CANCER RESEARCH                                                                                                                                                                                     | Meeting Abstract                                                                                               |
| Shumway et al.           | 2012 CANCER RESEARCH                                                                                                                                                                                     | Meeting Abstract                                                                                               |
| Schwarz et al.           | 2012 <a href="#">Cancer Prev Res (Phila). 2017 Oct;10(10):563-570.</a>                                                                                                                                   | Irrelevant research.                                                                                           |
| Schimming et al.         | 2012 <a href="#">Am J Dermatopathol. 2012 May;34(3):266-9.</a>                                                                                                                                           | Not a study of the prognosis of PHH3.                                                                          |
| Olar et al.              | 2012 <a href="#">Curr Treat Options Oncol. 2012 Dec;13(4):417-36.</a>                                                                                                                                    | Review.                                                                                                        |
| Ma et al.                | 2012 <a href="http://www.embase.com/search/results?subaction=viewrecord&amp;from=export&amp;id=L71003588">http://www.embase.com/search/results?subaction=viewrecord&amp;from=export&amp;id=L71003588</a> | Irrelevant research.                                                                                           |

|                       |                                                                                                                                                                                                            |                                                                                                                |
|-----------------------|------------------------------------------------------------------------------------------------------------------------------------------------------------------------------------------------------------|----------------------------------------------------------------------------------------------------------------|
| Lloyd et al.          | 2012 LABORATORY INVESTIGATION                                                                                                                                                                              | Meeting Abstract                                                                                               |
| Liu et al.            | 2012 Tianjin Medical Journal                                                                                                                                                                               | Not a study of the prognosis of PHH3.                                                                          |
| Li et al.             | 2012 <u>Brain Tumor Pathol. 2012 Jan;29(1):68-72.</u>                                                                                                                                                      | Case report.                                                                                                   |
| Ladstein et al.       | 2012 <u>J Invest Dermatol. 2012 Apr;132(4):1247-52.</u>                                                                                                                                                    | /                                                                                                              |
| Kudaybergenova et al. | 2012 VIRCHOWS ARCHIV                                                                                                                                                                                       | Meeting Abstract                                                                                               |
| Knutsvik et al.       | 2012 VIRCHOWS ARCHIV                                                                                                                                                                                       | Meeting Abstract                                                                                               |
| Kalantarli et al.     | 2012 <a href="http://www.embase.com/search/results?subaction=viewrecord&amp;from=export&amp;id=L365686006">http://www.embase.com/search/results?subaction=viewrecord&amp;from=export&amp;id=L365686006</a> | Not a study of the prognosis of PHH3.                                                                          |
| Kadaveru et al.       | 2012 <a href="http://www.embase.com/search/results?subaction=viewrecord&amp;from=export&amp;id=L71091586">http://www.embase.com/search/results?subaction=viewrecord&amp;from=export&amp;id=L71091586</a>   | Irrelevant research.                                                                                           |
| Ishizawa et al.       | 2012 <u>Clin Neuropathol. 2012 May-Jun;31(3):146-51.</u>                                                                                                                                                   | Lack of survival analysis data (hazard risk estimate or survival curve of OS, RFS, DFS).                       |
| Ishihara et al.       | 2012 EUROPEAN JOURNAL OF CANCER                                                                                                                                                                            | Meeting Abstract                                                                                               |
| Ikenberg et al.       | 2012 <u>J Cutan Pathol. 2012 Mar;39(3):324-30.</u>                                                                                                                                                         | Not a study of the prognosis of PHH3.                                                                          |
| Hikichi et al.        | 2012 <u>Mol Cancer Ther. 2012 Mar;11(3):700-9.</u>                                                                                                                                                         | Irrelevant research.                                                                                           |
| Hightower et al.      | 2012 <u>Pituitary. 2012 Dec;15(4):556-61. doi: 10.1007/s11102-011-0367-3.</u>                                                                                                                              | The follow-up outcome is TTP. Our study did not include studies on TTP because of the small number of studies. |
| Gunia et al.          | 2012 <u>J Clin Pathol. 2012 Aug;65(8):715-20.</u>                                                                                                                                                          | Not a study of the prognosis of PHH3.                                                                          |
| Gauchotte et al.      | 2012 <u>Am J Surg Pathol. 2012 Feb;36(2):283-91</u>                                                                                                                                                        | The follow-up outcome is PFS. Our study did not include studies on PFS because of the small number of studies. |
| Brunner et al.        | 2012 <u>Br J Cancer. 2012 Jun 26;107(1):84-90.</u>                                                                                                                                                         | /                                                                                                              |
| Braun et al.          | 2012 VIRCHOWS ARCHIV                                                                                                                                                                                       | Meeting Abstract                                                                                               |
| Alferez et al.        | 2012 <u>Int J Oncol. 2012 Oct;41(4):1475-85.</u>                                                                                                                                                           | Irrelevant research.                                                                                           |
| Zou et al.            | 2011 <u>Cell Cycle. 2011 Mar 15;10(6):989-98. Epub 2011 Mar 15.</u>                                                                                                                                        | Irrelevant research.                                                                                           |
| Verschraegen et al.   | 2011 <a href="http://www.embase.com/search/results?subaction=viewrecord&amp;from=export&amp;id=L70609385">http://www.embase.com/search/results?subaction=viewrecord&amp;from=export&amp;id=L70609385</a>   | Irrelevant research.                                                                                           |
| Um et al.             | 2011 <a href="http://www.embase.com/search/results?subaction=viewrecord&amp;from=export&amp;id=L70609306">http://www.embase.com/search/results?subaction=viewrecord&amp;from=export&amp;id=L70609306</a>   | Lack of survival analysis data (hazard risk estimate or survival curve of OS, RFS, DFS).                       |
| Tsuta et al.          | 2011 <u>Am J Clin Pathol. 2011 Aug;136(2):252-9.</u>                                                                                                                                                       | Not a study of the prognosis of PHH3.                                                                          |
| Silva et al.          | 2011 <u>Int J Gynecol Cancer. 2011 Jan;21(1):189-91.</u>                                                                                                                                                   | Review.                                                                                                        |
| Shih et al.           | 2011 JOURNAL OF CLINICAL ONCOLOGY                                                                                                                                                                          | Meeting Abstract                                                                                               |
| Phadke et al.         | 2011 <u>Am J Surg Pathol. 2011 May;35(5):656-69.</u>                                                                                                                                                       | Not a study of the prognosis of PHH3.                                                                          |
| Patterson et al.      | 2011 BIOLOGY OF REPRODUCTION                                                                                                                                                                               | Meeting Abstract                                                                                               |
| Olmos et al.          | 2011 <u>Clin Cancer Res. 2011 May 15;17(10):3420-30.</u>                                                                                                                                                   | Irrelevant research.                                                                                           |

|                    |                                                                                                                                                                                                                 |                                                                                                                |
|--------------------|-----------------------------------------------------------------------------------------------------------------------------------------------------------------------------------------------------------------|----------------------------------------------------------------------------------------------------------------|
| Margraf et al.     | 2011 <u>Neuro Oncol. 2011 Jul;13(7):767-74.</u>                                                                                                                                                                 | The follow-up outcome is PFS. Our study did not include studies on PFS because of the small number of studies. |
| Ladstein et al.    | 2011 CANCER RESEARCH                                                                                                                                                                                            | Meeting Abstract                                                                                               |
| Hsu et al.         | 2011 <u>Dev Biol. 2011 Jun 15;354(2):242-52.</u>                                                                                                                                                                | Irrelevant research.                                                                                           |
| Horinaga et al.    | 2011 JOURNAL OF CLINICAL ONCOLOGY                                                                                                                                                                               | Meeting Abstract                                                                                               |
| Horinaga et al.    | 2011 JOURNAL OF UROLOGY                                                                                                                                                                                         | Meeting Abstract                                                                                               |
| Habberstad et al.  | 2011 <u>Diagn Pathol. 2011 May 24;6:43.</u>                                                                                                                                                                     | Not a study of the prognosis of PHH3.                                                                          |
| Grundy et al.      | 2011 <u>BMC Cancer. 2011 Jun 16;11:254.</u>                                                                                                                                                                     | Irrelevant research.                                                                                           |
| Gudlaugsson et al. | 2011 <u>Mod Pathol. 2011 Apr;24(4):502-11.</u>                                                                                                                                                                  | /                                                                                                              |
| Diamond et al.     | 2011 CANCER RESEARCH                                                                                                                                                                                            | Meeting Abstract                                                                                               |
| Danaee et al.      | 2011 <u><a href="http://www.embase.com/search/results?subaction=viewrecord&amp;from=export&amp;id=L70609300">http://www.embase.com/search/results?subaction=viewrecord&amp;from=export&amp;id=L70609300</a></u> | Irrelevant research.                                                                                           |
| <b>Aune et al.</b> | 2011 <u>Int J Clin Exp Pathol. 2011 Jun 20;4(5):444-53. Epub 2011 Jun 11.</u>                                                                                                                                   | Statistical defect.                                                                                            |
| Angi et al.        | 2011 <u>Acta Ophthalmol. 2011 Mar;89(2):e155-60. doi: 10.1111/j.1755-3768.2009.01769.x.</u>                                                                                                                     | Not a study of the prognosis of PHH3.                                                                          |
| Nasir et al.       | 2010 <u><a href="http://www.embase.com/search/results?subaction=viewrecord&amp;from=export&amp;id=L70309910">http://www.embase.com/search/results?subaction=viewrecord&amp;from=export&amp;id=L70309910</a></u> | Irrelevant research.                                                                                           |
| Marangoni et al.   | 2010 <u><a href="http://www.embase.com/search/results?subaction=viewrecord&amp;from=export&amp;id=L70310394">http://www.embase.com/search/results?subaction=viewrecord&amp;from=export&amp;id=L70310394</a></u> | Irrelevant research.                                                                                           |
| Ladstein et al.    | 2010 <u>BMC Cancer. 2010 Apr 14;10:140. doi: 10.1186/1471-2407-10-140.</u>                                                                                                                                      | Repeated study by the same author.                                                                             |
| Hayashi et al.     | 2010 <u><a href="http://www.embase.com/search/results?subaction=viewrecord&amp;from=export&amp;id=L70667855">http://www.embase.com/search/results?subaction=viewrecord&amp;from=export&amp;id=L70667855</a></u> | Irrelevant research.                                                                                           |
| Grundy et al.      | 2010 <u>Mol Cancer Ther. 2010 Mar;9(3):661-72.</u>                                                                                                                                                              | Irrelevant research.                                                                                           |
| Glatz et al.       | 2010 <u>Am J Dermatopathol. 2010 Oct;32(7):643-9.</u>                                                                                                                                                           | Not a study of the prognosis of PHH3.                                                                          |
| Casper et al.      | 2010 <u>Am J Dermatopathol. 2010 Oct;32(7):650-4.</u>                                                                                                                                                           | Not a study of the prognosis of PHH3.                                                                          |
| Blackman et al.    | 2010 JOURNAL OF CLINICAL ONCOLOGY                                                                                                                                                                               | Meeting Abstract                                                                                               |
| Veras et al.       | 2009 <u>Int J Gynecol Pathol. 2009 Jul;28(4):316-21.</u>                                                                                                                                                        | Not a study of the prognosis of PHH3.                                                                          |
| Goodarzi et al.    | 2009 LABORATORY INVESTIGATION                                                                                                                                                                                   | Meeting Abstract                                                                                               |
| Gilmartin et al.   | 2009 <u>Cancer Res. 2009 Sep 1;69(17):6969-77.</u>                                                                                                                                                              | Irrelevant research.                                                                                           |
| Fukushima et al.   | 2009 <u>Brain Tumor Pathol. 2009;26(2):51-7.</u>                                                                                                                                                                | Not a study of the prognosis of PHH3.                                                                          |
| Evason et al.      | 2009 LABORATORY INVESTIGATION                                                                                                                                                                                   | Meeting Abstract                                                                                               |
| Yoo-Jin et al.     | 2008 <u>Pathologe. 2008 Nov;29(6):428-33.</u>                                                                                                                                                                   | Lack of survival analysis data (hazard risk estimate or survival curve of OS, RFS, DFS).                       |
| Shah et al.        | 2008 <u>Int J Gynecol Pathol. 2008 Oct;27(4):534-8.</u>                                                                                                                                                         | Lack of survival analysis data (hazard risk estimate or survival curve of OS, RFS, DFS).                       |
| Nasr et al.        | 2008 <u>Am J Dermatopathol. 2008 Apr;30(2):117-22.</u>                                                                                                                                                          | Not a study of the prognosis of PHH3.                                                                          |
| Takei et al.       | 2007 <u>Arch Pathol Lab Med. 2007 Feb;131(2):234-41.</u>                                                                                                                                                        | Review                                                                                                         |



---

|                |                                                                   |                                                                                          |
|----------------|-------------------------------------------------------------------|------------------------------------------------------------------------------------------|
| Romani et al.  | 2007 <u>BMC Cancer. 2007 Dec 21;7:232.</u>                        | Irrelevant research.                                                                     |
| Kim et al.     | 2007 <u>Am J Clin Pathol. 2007 Jul;128(1):118-25.</u>             | /                                                                                        |
| Kapur et al.   | 2007 <u>Arch Pathol Lab Med. 2007 Jan;131(1):57-64.</u>           | Not a study of the prognosis of PHH3.                                                    |
| Yin et al.     | 2006 <u>Mod Pathol. 2006 Nov;19(11):1487-97. Epub 2006 Aug 4.</u> | Not a study of the prognosis of PHH3.                                                    |
| Tapia et al.   | 2006 <u>Am J Surg Pathol. 2006 Jan;30(1):83-9.</u>                | Not a study of the prognosis of PHH3.                                                    |
| Liu et al.     | 2006 <u>J Neuropathol Exp Neurol. 2006 Sep;65(9):905-13.</u>      | Not a study of the prognosis of PHH3.                                                    |
| Colman et al.  | 2006 <u>Am J Surg Pathol. 2006 May;30(5):657-64.</u>              | Lack of survival analysis data (hazard risk estimate or survival curve of OS, RFS, DFS). |
| Ribalta et al. | 2004 <u>Am J Surg Pathol. 2004 Nov;28(11):1532-6.</u>             | Not a study of the prognosis of PHH3.                                                    |

---

**Abbreviations:** PHH3= Phospho-histone-h3, OS = overall survival, DFS = disease-free survival, RFS = recurrence-free survival, TTP=time to progression, PFS=progression-free survival.
